# Supplementary material for: Characterization of a Novel MAP4K4-SASH1 Kinase Cascade Regulating&nbsp;Breast Cancer Tumorigenesis and Metastasis
Source: Research Square preprint supplement (doi:10.21203/rs.3.rs-101160/v1), 2020-11-05
Supplement: Supplementary file 1 [file da525ef975c990c533f09be8.docx]

**Table S2 Clinicopathologic parameters according to SASH1 and p53 expression in human breast cancer tissue arrays**

| Variable | Overall  No.(%) | SASH1(N=145)  low high | | P **※** | | p53 (N=140)  low high | | | P**※** |
| --- | --- | --- | --- | --- | --- | --- | --- | --- | --- |
| Age  < 60  ≥60  Tumor size(cm)  ≤3  > 3  Location  left  right  Tumor stage  T1  T2  T3  lymph Node status  N0  N1  N2  N3  Clinical stages  Ⅰ  Ⅱ  Ⅲ | 98  47  87  57  67  78  33  96  15  51  46  37  8  10  84  48 | 82  36  71  46  53  65  26  79  12  41  38  28  8  8  68  39 | 16  11  16  11  14  13  7  17  3  10  8  9  0  2  16  9 | 0.2922  1  0.6612  6.77E-10  0.005253  2.20E-16 | 89  44  81  52  61  73  29  89  14  47  42  35  7  9  77  37 | | 4  2  4  2  3  3    2  3  1    2  2  2  0  1  3  1 | 1  1  1  1  2.20E-16  0.004908  2.20E-16 | |

※ Chi-square test (2-sided), SASH1 IHC-scores≤6 indicates SASH1 low expression， SASH1 IHC-scores>6 indicates SASH1 high expression. , p53 IHC-scores≤2.89 indicates p53 low expression， p53 IHC-scores>2.89 indicates p53 high expression.
